# Supplementary material for: Ni–P synergetic deposition: electrochemically deposited highly active Ni as a catalyst for chemical deposition
Source: Royal Society of Chemistry journal article supplement (doi:10.1039/c5ra01027f), 2015-01-01
Supplement: c5ra01027f1.pdf [file c5ra01027f1.pdf]

## Electronic Supplementary Information

# Ni-P synergetic deposition: electrochemically deposited high active Ni as catalyst for chemical deposition

Quanyao Yu<sup>1,2</sup>, Zhixiang Zeng<sup>1\*</sup>, Yu Liang<sup>1</sup>, Wenjie Zhao<sup>1\*</sup>, Shusen Peng<sup>1</sup>, Zhiyue

Han<sup>1</sup>, Gang Wang<sup>1</sup>, Xuedong Wu<sup>1</sup>, Qunji Xue<sup>1</sup>

<sup>1</sup> *Key Laboratory of Marine Materials and Related Technologies, Zhejiang Key Laboratory of Marine Materials and Protective Technologies, Ningbo Institute of Materials Technology and Engineering, Chinese Academy of Sciences, Ningbo, 315201, PR China;*

<sup>2</sup> *University of Chinese Academy of Sciences, Beijing, 100039, PR China.*

# Table of content

|                                                                                                                                                                                                                                                                                                                                                                   |   |
|-------------------------------------------------------------------------------------------------------------------------------------------------------------------------------------------------------------------------------------------------------------------------------------------------------------------------------------------------------------------|---|
| ESI 1 The schematic diagram of the three-electrode electrochemical cell set-up. The low alloy steel working electrode is sealed by the Polytetrafluoroethylene (PTFE) supporter and the area exposed to the solution is 1cm <sup>2</sup> . The saturated Ag/AgCl reference electrode is placed into the luggin capillary filled with saturated KCl solution. .... | 3 |
| ESI 2 table: Analysis of the current maxima for Ni-P alloy films deposited at different potential .....                                                                                                                                                                                                                                                           | 4 |
| ESI 3 j-t curves of Ni-P deposition with 0.05M reducing agent in the solution and Na <sub>2</sub> SO <sub>4</sub> added into the same solution was used as comparison. ....                                                                                                                                                                                       | 5 |
| ESI 4 Film composition of Ni-P deposit cured with different reducing agents in the solution. ....                                                                                                                                                                                                                                                                 | 6 |
| ESI 5 Contact angle of Ni-P alloy films with patterned morphology for different deposition time: a) 5min; b) 10min; c) 30min; d) 60min. Inserts showed the optical graph of water droplet on the Ni-P alloys films with patterned morphologies. ....                                                                                                              | 7 |

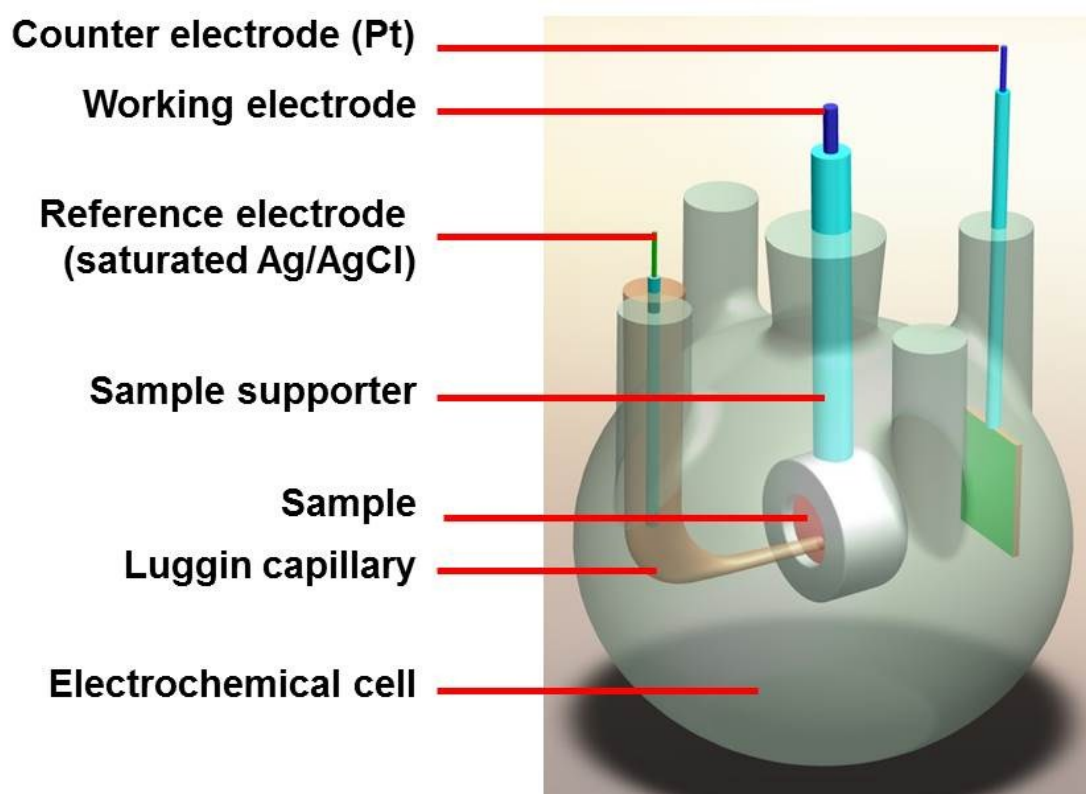

ESI 1 The schematic diagram of the three-electrode electrochemical cell set-up. The low alloy steel working electrode is sealed by the Polytetrafluoroethylene (PTFE) supporter and the area exposed to the solution is  $1\text{cm}^2$ . The saturated Ag/AgCl reference electrode is placed into the luggin capillary filled with saturated KCl solution.

ESI 2 table: Analysis of the current maxima for Ni-P alloy films deposited at different potential

| E /V | $t_m$ /s | $j_m$ /mA cm <sup>-2</sup> | $j_m^2 t_m$ /(mA cm <sup>-2</sup> ) <sup>2</sup> s |
|------|----------|----------------------------|----------------------------------------------------|
| -0.1 | 28.7     | 4.45*10 <sup>-3</sup>      | 5.68*10 <sup>-4</sup>                              |
| -0.2 | 1.4      | 10.71*10 <sup>-3</sup>     | 1.60*10 <sup>-4</sup>                              |
| -0.3 | 0.4      | 31.58*10 <sup>-3</sup>     | 3.98*10 <sup>-4</sup>                              |
| -0.5 | 0.1      | 41.39*10 <sup>-3</sup>     | 1.71*10 <sup>-4</sup>                              |

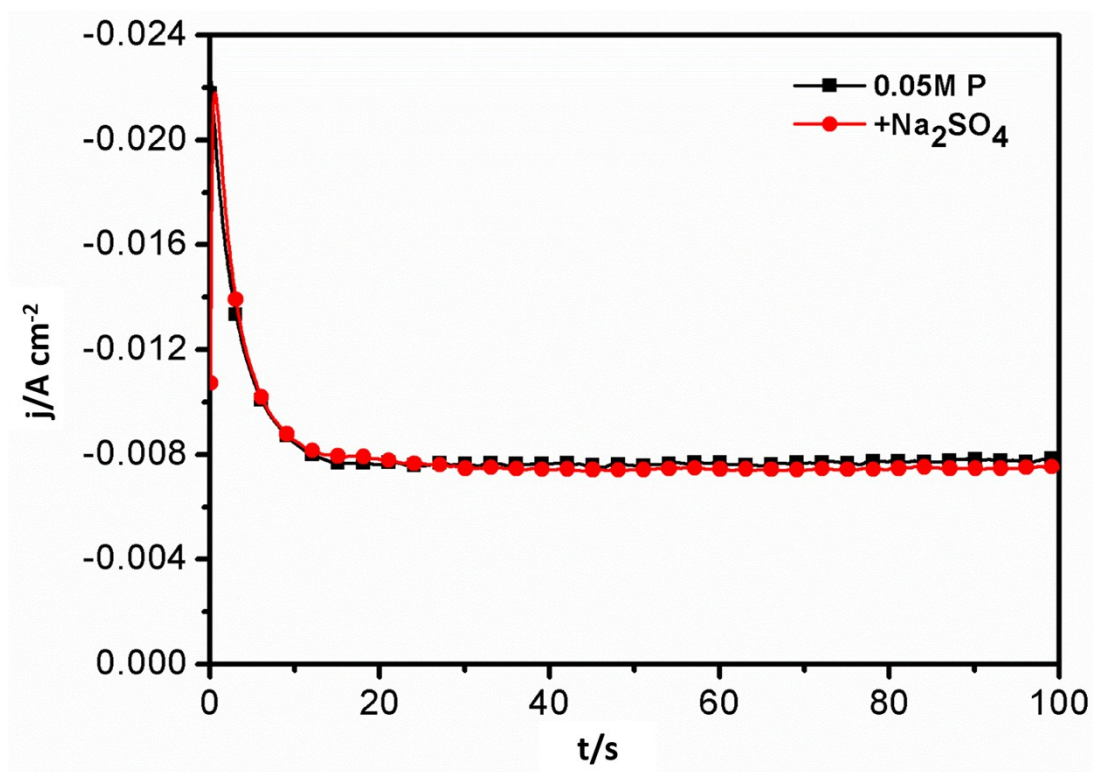

ESI 3 j-t curves of Ni-P deposition with 0.05M reducing agent in the solution and Na<sub>2</sub>SO<sub>4</sub> added into the same solution was used as comparison.

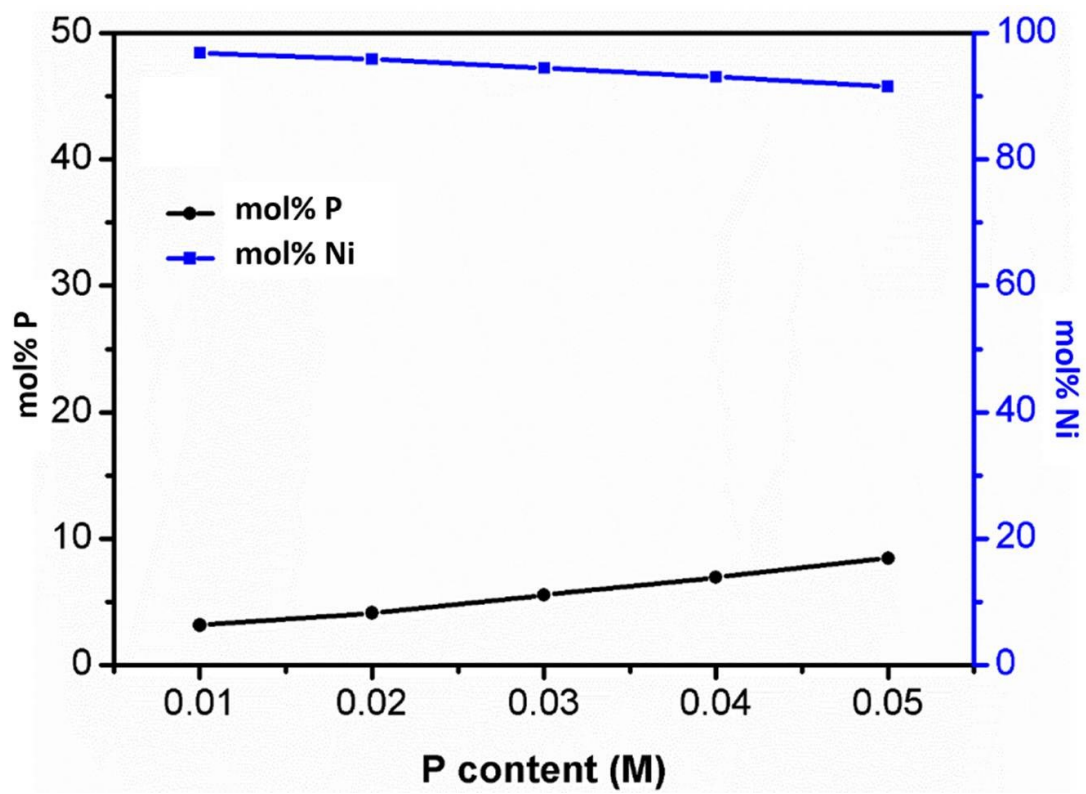

ESI 4 Film composition of Ni-P deposit with different reducing agent in the solution.

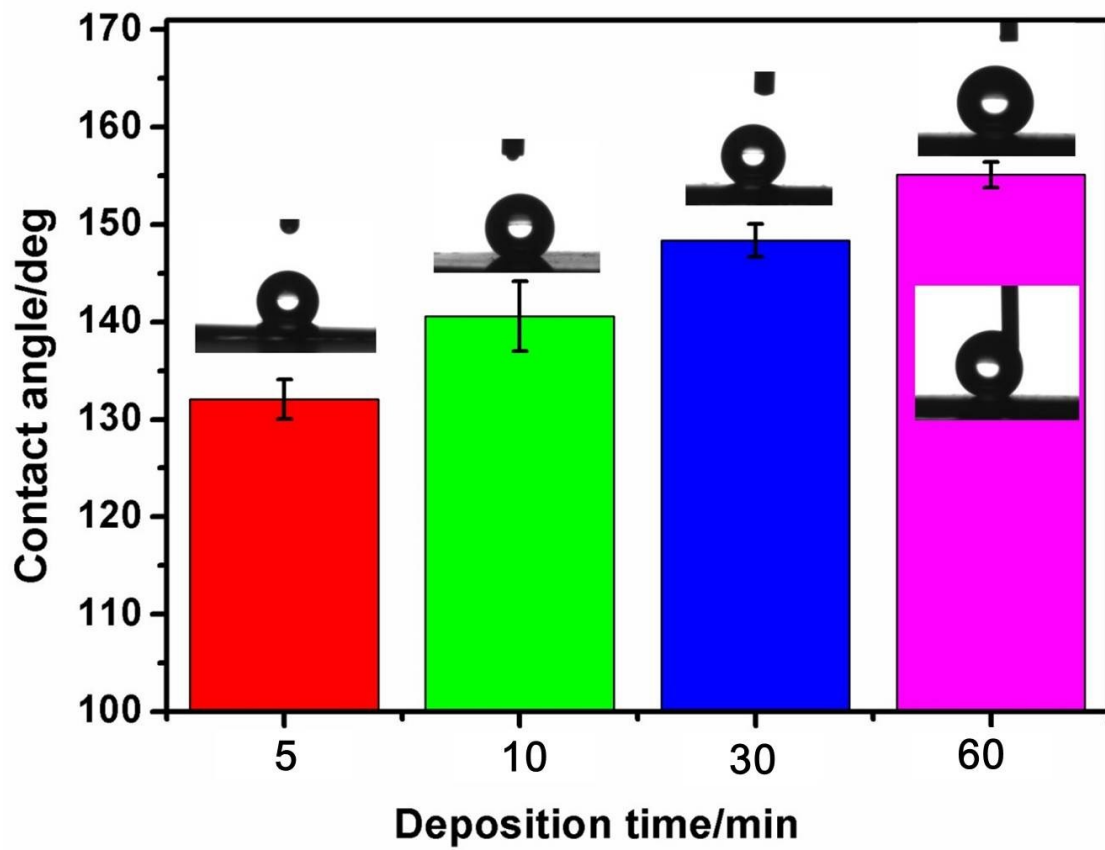

ESI 5 Contact angle of Ni-P alloy films with patterned morphology for different deposition time: a) 5min; b) 10min; c) 30min; d) 60min. Inserts showed the optical graphs of water droplet on the Ni-P alloys films with patterned morphologies.
